# Supplementary material
Source: MDPI journal article supplement (https://www.mdpi.com/2311-7524/9/4/466)
Supplement: s1 [file s1 › Figure S1.xls]

## Sheet: PCA
Figure S1: Individual metabolites that are significantly (p ≤ 0.05) higher in hairy root of green and red kimchi cabbage grown under light and dark conditions.

## Sheet: PLSDA
Figure S1: Individual metabolites that are significantly (p ≤ 0.05) higher in hairy root of green and red kimchi cabbage grown under light and dark conditions.
